# Supplementary material for: Hepatitis C Virus Is a Weak Inducer of Interferon Alpha in Plasmacytoid Dendritic Cells in Comparison with Influenza and Human Herpesvirus Type-1
Source: PubMed Central journal article supplement (PMC2629532; doi:10.1371/journal.pone.0004319), 2009-02-02
Supplement: pone.0004319.s001.pdf [file pone.0004319.s001.pdf]

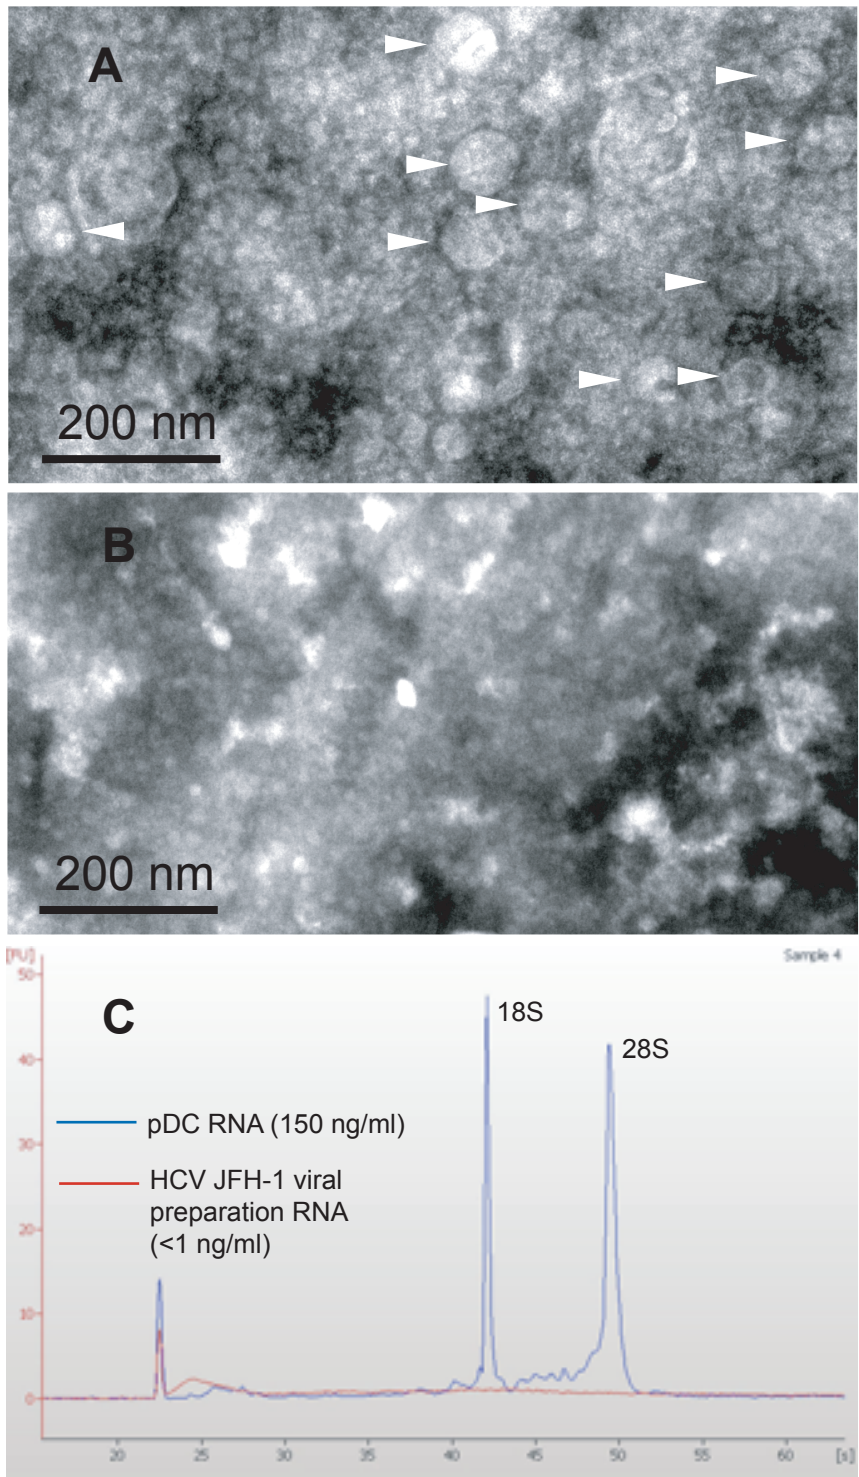

Figure S1
